# Supplementary material for: Alzheimer’s Disease-Associated Alternative Splicing of CD33 Is Regulated by the HNRNPA Family Proteins
Source: MDPI journal article supplement (doi:10.3390/cells12040602), 2023-02-13
Supplement: s1 [file s1]

## Supplementary information

### **Alzheimer's disease-associated alternative splicing of *CD33* is regulated by the HNRNPA family proteins**

Riho Komuro<sup>1,2,3</sup>, Yuka Honda<sup>1</sup>, Motoaki Yanaizu<sup>1,2</sup>, Masami Nagahama<sup>3</sup>, Yoshihiro Kino<sup>1,2,\*</sup>

<sup>1</sup>Department of Bioinformatics and Molecular Neuropathology, Meiji Pharmaceutical University, 2-522-1, Noshio, Kiyose-shi, Tokyo 204-8588, Japan

<sup>2</sup>Department of RNA Pathobiology and Therapeutics, Meiji Pharmaceutical University, 2-522-1, Noshio, Kiyose-shi, Tokyo 204-8588, Japan

<sup>3</sup>Department of Molecular and Cellular Biochemistry, Meiji Pharmaceutical University, 2-522-1, Noshio, Kiyose-shi, Tokyo 204-8588, Japan

\*Corresponding author: Tel.: +81-42-495-8679, E-mail: kino@my-pharm.ac.jp

## **Supplementary Materials and Methods**

### **Azurite-NLS vector**

The Azurite variant of blue fluorescence protein was engineered from pEBFP-C1 (Takara Bio, Shiga, Japan) by PCR-mediated mutagenesis to introduce T66S, V151I, V225R, and L232R substitutions using primers including Azu-g197-Fw, Azu-g197-Rv, Azu-a451-Fw, Azu-a451-Rv, and BspEI-Azu-Rv according to a method previously described [1]. The fragment of Azurite was fused with three copies of the SV40 nuclear localization signal (encoding PKKKRKV) by insertion into pEGFP-C1-NLS vector [1], resulting in pAzurite-NLS.

### **Construction of the PB-Tet-Azu-Puro vector**

PB-Cuo-MCS-IRES-GFP-EF1-CymR-Puro (System Biosciences, Palo Alto, CA, USA) was digested with NotI and SalI to remove a fragment covering EMCV-IRES, copGFP, EF1a promoter, and CymR-2A-Puro. The EF1a promoter and CymR-2A-Puro fragment was then PCR amplified using a primer set, NotI-EF1a-Fw and SalI-Puro-Rv, digested with NotI and SalI, and ligated into the digested vector. The Cumate Switch promoter was replaced with a CMV promoter using NheI and SpeI. Then, the

EF1a-CymR-2A-Puro fragment was replaced with EF1a-Azurite-NLS-2A-Puro that was assembled using NEBuilder HiFi DNA Assembly Master Mix (New England Biolabs, Ipswich, MA, USA) and three PCR fragments of EF1a, Azurite-NLS, and 2A-Puro. The resulting vector was designated as PB-CMV-Azu-Puro. The CMV promoter of this vector was replaced at the SpeI/SalI sites with a fragment containing Tet-ON-3G and Tet-3GS amplified from pAAV-TetOne vector (Takara Bio) using primer set NheI-Tet-Fw and SalI-Tet-Rv, resulting in the PB-Tet-Azu-Puro vector. EGFP, EGFP-HNRNPA1, and EGFP-Hnrnpa1 were inserted in the multi-cloning site downstream of the Tet3GS sequence in PB-Tet-Azu-Puro.

### **Inducible cell lines**

To establish inducible EGFP-HNRNPA1 and EGFP cell lines, THP-1 cells were transfected with PB-Tet-EGFP-A1-Azu-Puro and PB-Tet-EGFP-Azu-Puro together with a plasmid encoding Super PiggyBac, which was subcloned from Super PiggyBac transposase expression vector (Systems Biosciences), using GeneXPlus (ATCC, Manassas VA, USA). EGFP-positive cells were selected with puromycin and then plated at 1 cell per well in a 96-well plates by fluorescence-activated cell sorting using a MA900 cell sorter (SONY, Tokyo, Japan). Cell clones were checked for their protein

expression upon doxycycline treatment (1 µg/ml). Similarly, RAW267.4-based cells were established using PB-Tet-Azu-Puro vectors containing EGFP or EGFP-Hnrnpa1 that were transfected using the K2 Transfection System (Biontix, Landsberger, München, Germany) according to the manufacturer's protocol. Cell pictures were obtained using EVOS M5000 Imaging System (Thermo Fisher Scientific, Waltham, MA, USA). Although Azurite-NLS is expressed under the EF1-alpha promoter, we repeatedly observed its up-regulation when dox was added, probably because Azu-NLS is also located downstream of the dox-inducible promoter (Tet-3GS).

### **Splicing analysis using RNA-seq data**

RNA-seq data were retrieved at GEO DataSets (<https://www.ncbi.nlm.nih.gov/gds>). We chose datasets containing at least three experiments (three samples) for one condition or one cell type. Read counts corresponding to *Cd33* splicing patterns were determined using blastn with the setting of megablast as program, SRA as database, and the following junctional sequences as queries: “GCTGTCACATGTGACCTCTCTATCACGGAC TCCTGAC” for conventional exon 2 inclusion, “GCTCCTGGCTCCGGA AAGGGCTCTATCACGGACTCCTGAC” for partial inclusion of exon 2, and “GCTGTTCTTGCTGTGT

GCAGCTCTATCACGGACTCCTGAC” for exon skipping. The number of sequence matched was regarded as the read count for each splicing pattern. The proportion of each splicing patterns in an experiment was calculated as the read count of a pattern divided by the sum of all patterns and then multiplied by 100. We then calculated the average and the standard deviation of the proportion of splicing patterns of a cell type or a condition.

### **Supplementary reference**

1. Kino, Y., et al., *Nuclear localization of MBNL1: splicing-mediated autoregulation and repression of repeat-derived aberrant proteins*. Hum Mol Genet, 2015. **24**(3): p. 740-756.

**Table S1.** List of oligonucleotides used in this study.

**Table S2.** List of antibodies used in this study.

**Table S3.** List of RNA-seq data used for splicing analysis.

**Figure S1.** A cryptic splice site induced by EGFP-Ptbp1 and EGFP-Pcbp2.

Schematic illustration of cryptic 3 splice site in exon 3.

**Figure S2.** Expression of HNRNPA family proteins.

(A) HEK293 cells were treated with siRNA(s) and then analyzed with western blotting using indicated antibodies.

(B) HEK293 cells were transfected with indicated plasmids obtained from the OriCiro system. Cell lysates were analyzed with western blotting using an anti-GFP antibody.

(C) Neuro2a cells were treated with siRNA(s) and analyzed with western blotting using indicated antibodies.

**Figure S3.** A THP-1-based cell line inducibly expressing EGFP or EGFP-HNRNPA1.

(A) Structure of PB-Tet-Azu-Puro vector used for inducible expression of EGFP and EGFP-HNRNPA1. Azu: Azurite blue fluorescence protein fused with three copies of

nuclear localization signal. PB: PiggyBac; pA: SV40 polyA signal; hPGK: Tet-On 3G: Tet-On 3G transactivator, human PGK promoter; TB: transcription blocker; Tet-3GS: Tet-3GS promoter; EF1a: EF1a promoter; puro: puromycin resistance gene; ins: insulator; 2A: T2A self-cleaving peptide.

(B) Expression of Azu and EGFP-HNRNPA1 in the THP-1-based cells harboring the above minigenes. Cell images in the presence and absence of doxycycline are shown. Azu is visualized using DAPI filter panels. Scale bar: 150  $\mu$ m.

(C) Expression of EGFP and EGFP-HNRNPA1 detected in a western blot analysis using indicated antibodies. As Azu is a variant protein derived from GFP, it cross-reacts with anti-GFP antibody.

**Figure S4.** *CD33* splicing regulation by HNRNPA proteins in human microglial-like cells.

Quantitative analysis (right panel) of human induced pluripotent stem cell-derived microglia-like cells (iCell Microglia) treated with siRNA and subjected to the *CD33* splicing assay using RT-PCR (left panel). Error bars represent the SD (n = 4). Welch's t-test was used for statistical evaluation (\*p = 0.0102).

**Figure S5. Alternative splicing of mouse *Cd33* exon 2.**

(A) Splicing assay of mouse *Cd33* in the hippocampus of male mice of different ages.

(B) Splicing analysis of *Cd33* using RNA-seq data (GSE164675) of microglial cells isolated from 3 and 17 months old mice (n = 4).

(C) Splicing analysis of *Cd33* using RNA-seq data (GSE171195) of microglial cells isolated from transgenic Alzheimer's disease model male mice and non-transgenic control male mice at 10 months old (n = 3).

(D) Splicing analysis of *Cd33* using RNA-seq data of myeloid cells from PyMT breast cancer model mice (n = 3, female at unspecified age, GSE212643), dendritic cells (n = 4, from 6–8 weeks old female mice, GSE205069), and Mast Cells (n = 3, from bone marrow of BALB/c mice, GSE206630). In B-D, error bars represent SD.

**Figure S6. Effect of siRNA targeting HNRNPA proteins on *Cd33* splicing in RAW264.7 cells.**

(A) RAW264.7 cells were treated with siRNA and analyzed using *Cd33* splicing assay. There was negligible detection of exon 2 skipping.

(B) Quantification of splicing assay results. Bar chart shows the proportion of partial exon 2 inclusion (n = 3). Error bars represent SD. No significant difference was



observed (Tukey's test).

**Figure S7.** RAW264.7-based cells inducibly expressing EGFP or EGFP-Hnrnpa1.

(A) PB-Tet-Azu-Puro vector used for inducible expression of EGFP and EGFP-Hnrnpa1.

Azu: Azurite blue fluorescence protein fused with three copies of nuclear localization signal. Structure details are as in Fig. S3A.

(B) Expression of Azu and EGFP-Hnrnpa1 in the RAW264.7 cells harboring the above constructs. Cell images in the presence and absence of doxycycline are shown. Azu was visualized using DAPI filter panels. Scale bar: 150  $\mu$ m.

(C) Expression of EGFP and EGFP-Hnrnpa1 detected with western blotting using indicated antibodies.

**Figure S8.** Prediction of CD33 proteins derived from the detected splicing products.

Termination codons that lead to truncation of the C-terminus are shown in red.

**Figure S9.** Uncropped gel images.

**Figure S1**

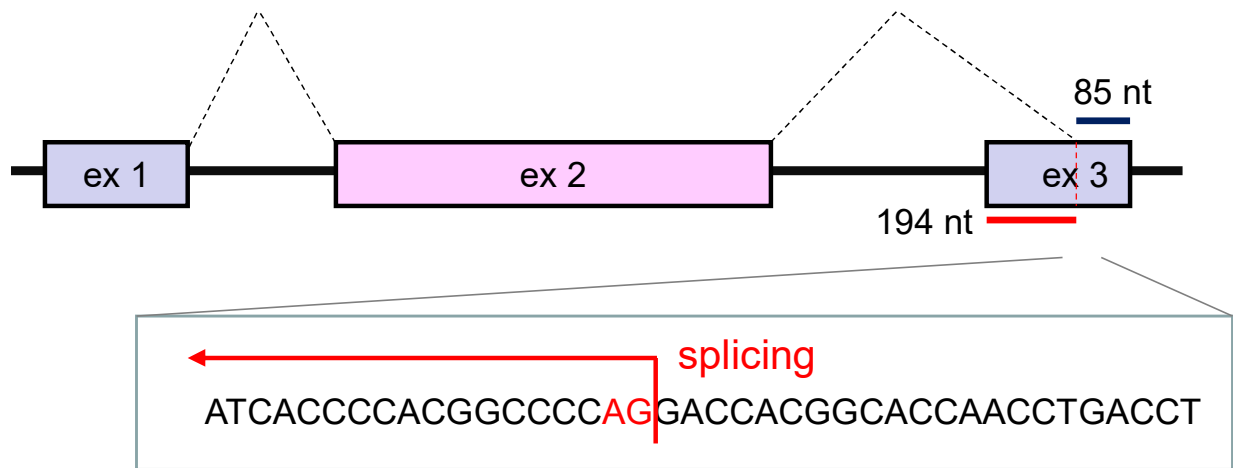

**Figure S1. A cryptic splice site induced by EGFP-Ptbp1 and EGFP-Pcbp2.**

Schematic illustration of cryptic 3 splice site in exon 3.

**Figure S2**

**A**

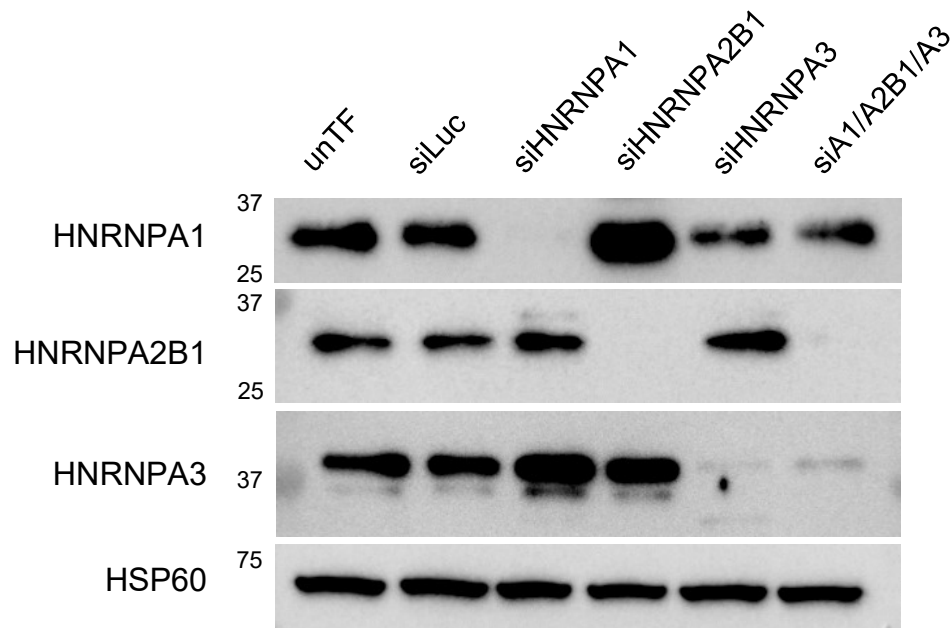

**B**

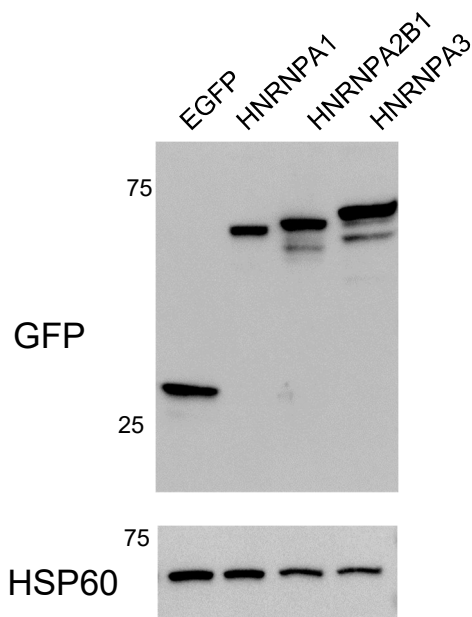

**C**

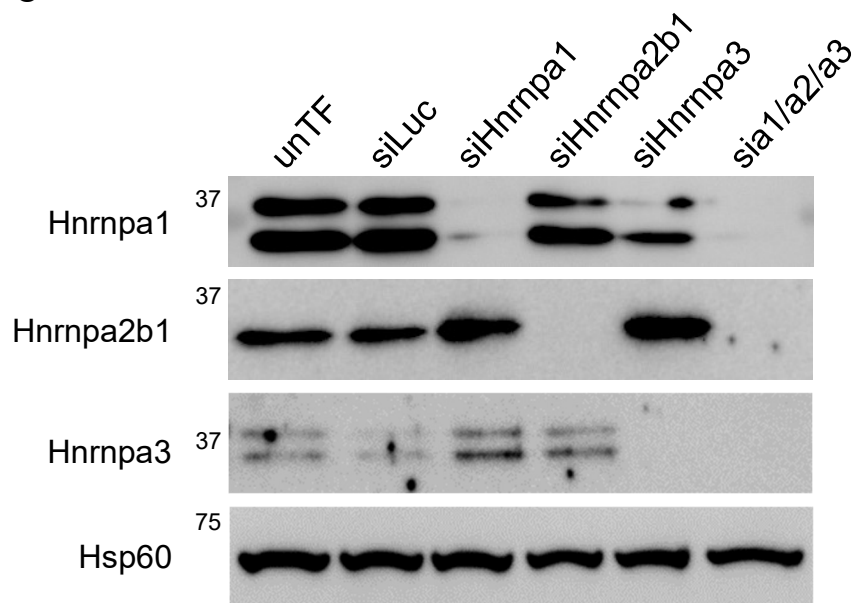

**Figure S2. Expression of HNRNPA family proteins.**

(A) HEK293 cells were treated with siRNA(s) and then analyzed with western blotting using indicated antibodies.

(B) HEK293 cells were transfected with indicated plasmids obtained from the OriCiro system. Cell lysates were analyzed with western blotting using an anti-GFP antibody.

(C) Neuro2a cells were treated with siRNA(s) and analyzed with western blotting using indicated antibodies.

**Figure S3**

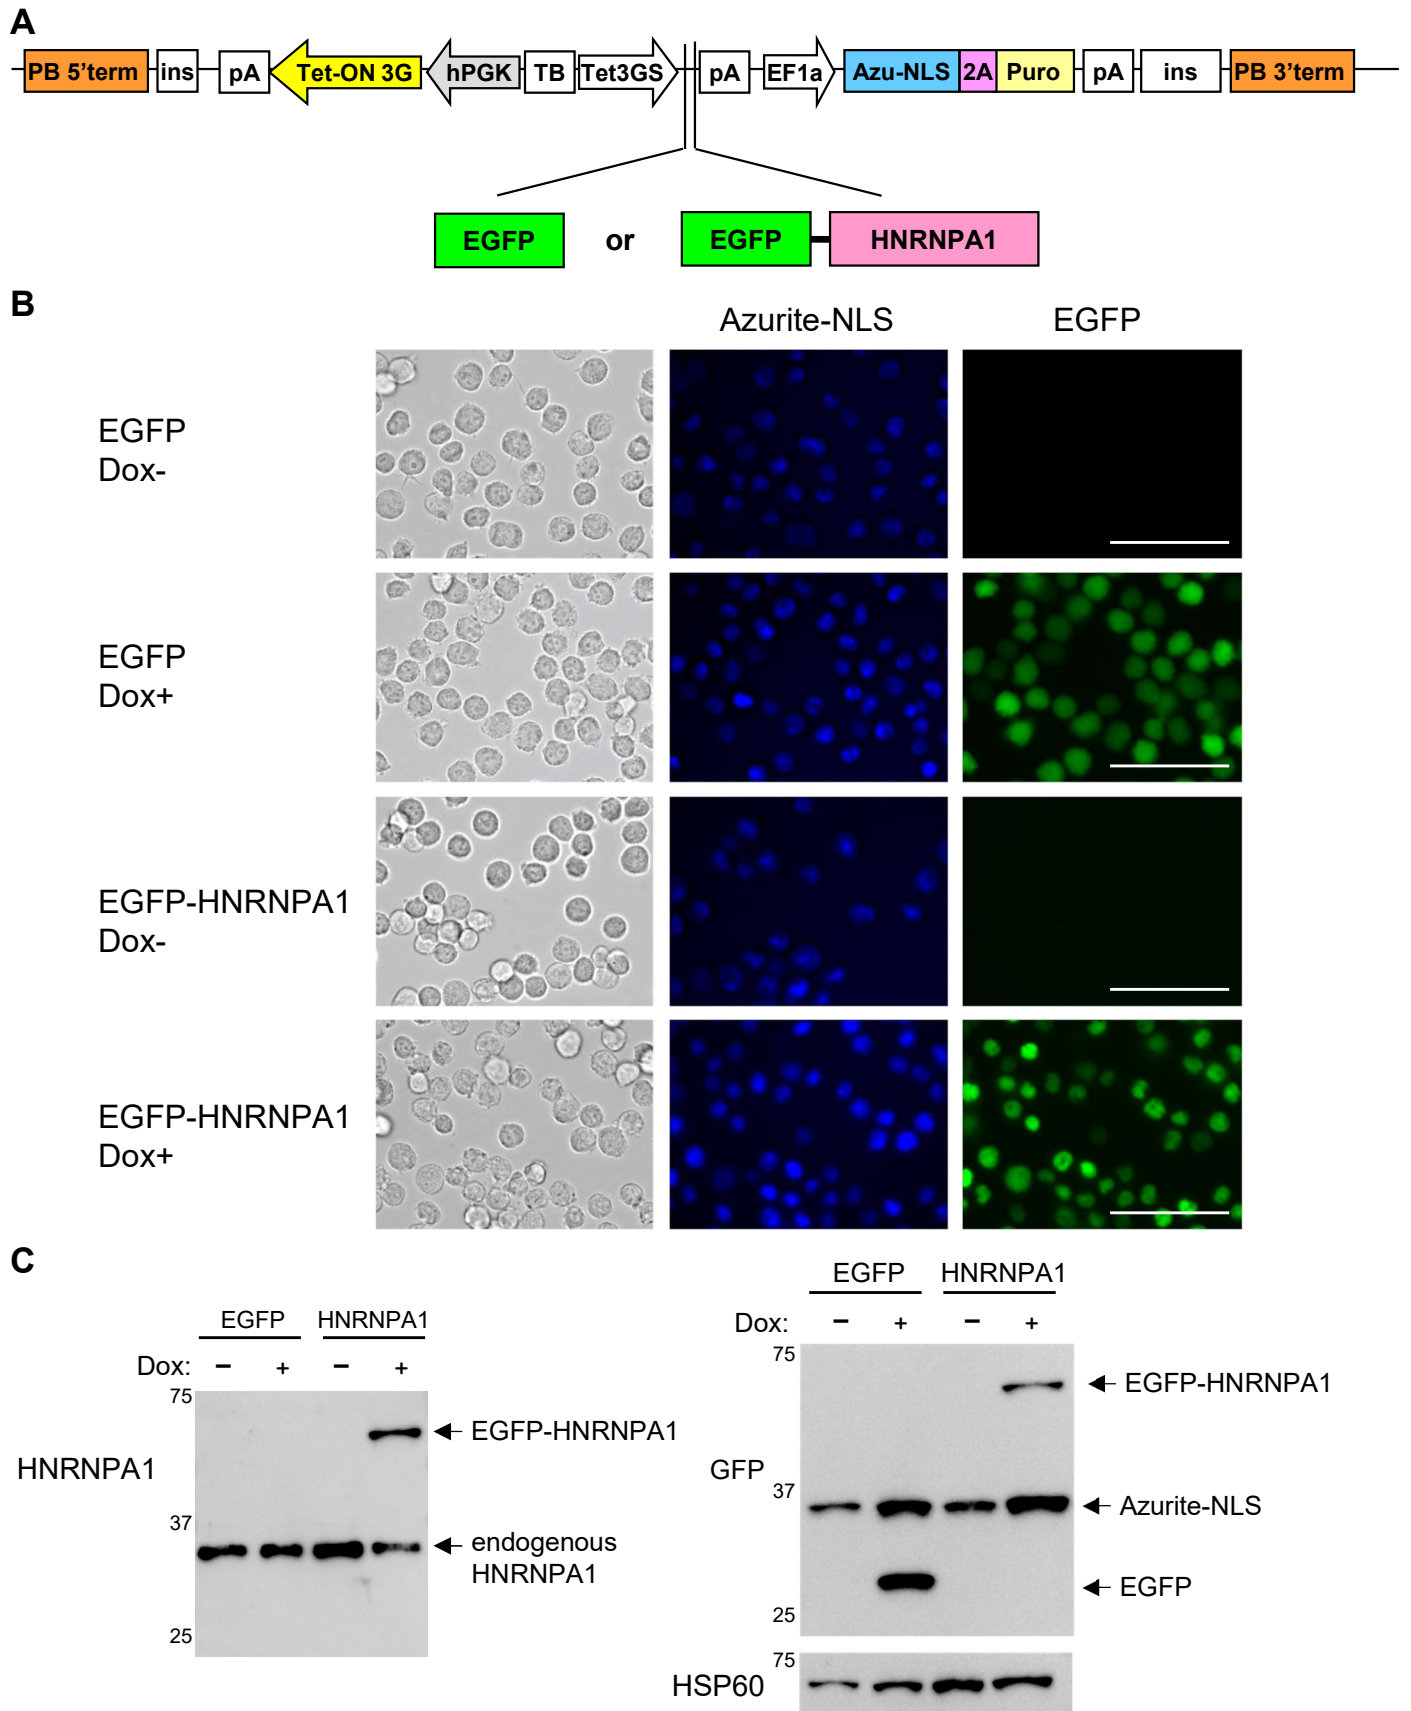

**Figure S3. A THP-1-based cell line inducibly expressing EGFP or EGFP-HNRNPA1.**

(A) Structure of PB-Tet-Azu-Puro vector used for inducible expression of EGFP and EGFP-HNRNPA1. Azu: Azurite blue fluorescence protein fused with three copies of nuclear localization signal. PB: PiggyBac; pA: SV40 polyA signal; hPGK: Tet-On 3G: Tet-On 3G transactivator, human PGK promoter; TB: transcription blocker; Tet-3GS: Tet-3GS promoter; EF1a: EF1a promoter; puro: puromycin resistance gene; ins: insulator; 2A: T2A self-cleaving peptide.

(B) Expression of Azu and EGFP-HNRNPA1 in the THP-1-based cells harboring the above minigenes. Cell images in the presence and absence of doxycycline are shown. Azu is visualized using DAPI filter panels. Scale bar: 150  $\mu$ m.

(C) Expression of EGFP and EGFP-HNRNPA1 detected in a western blot analysis using indicated antibodies. As Azu is a variant protein derived from GFP, it cross-reacts with anti-GFP antibody.

**Figure S4**

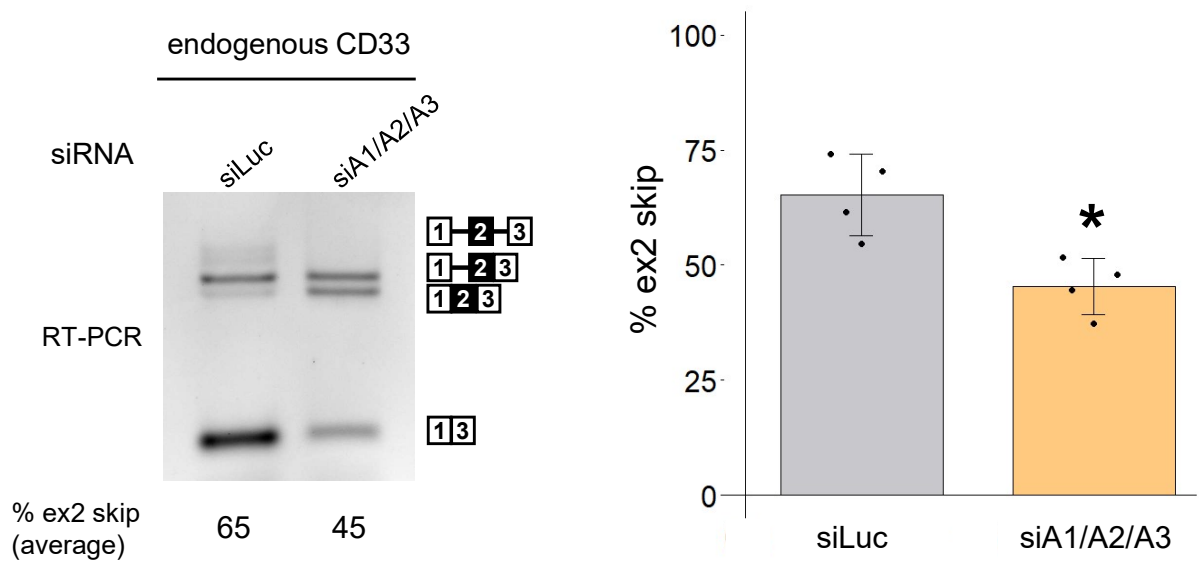

**Figure S4. *CD33* splicing regulation by HNRNPA proteins in human microglial-like cells.**

Quantitative analysis (right panel) of human induced pluripotent stem cell-derived microglia-like cells (iCell Microglia) treated with siRNA and subjected to the *CD33* splicing assay using RT-PCR (left panel). Error bars represent the SD (n = 4). Welch's t-test was used for statistical evaluation (\*p = 0.0102).

# Figure S5

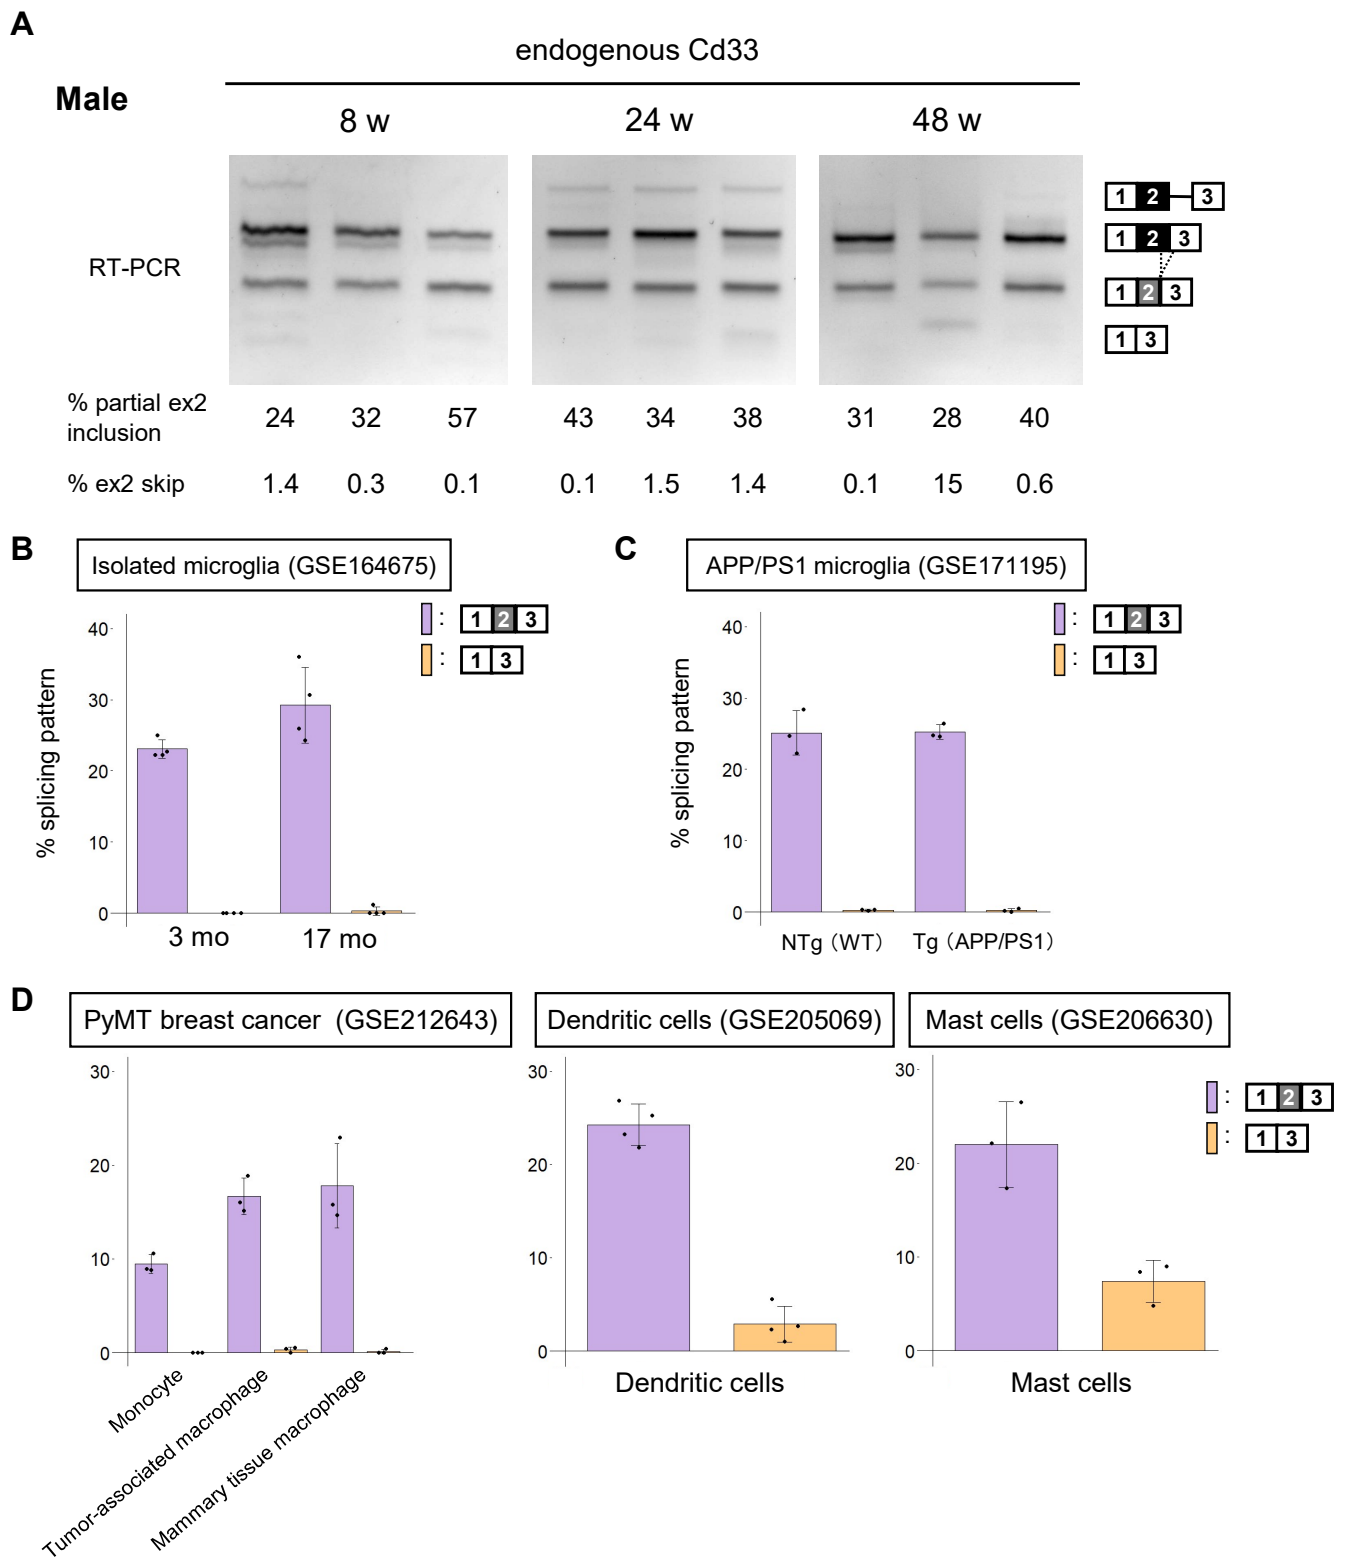

**Figure S5. Alternative splicing of mouse *Cd33* exon 2.**

(A) Splicing assay of mouse *Cd33* in the hippocampus of male mice of different ages.

(B) Splicing analysis of *Cd33* using RNA-seq data (GSE164675) of microglial cells isolated from 3 and 17 months old mice ( $n = 4$ ).

(C) Splicing analysis of *Cd33* using RNA-seq data (GSE171195) of microglial cells isolated from transgenic Alzheimer's disease model male mice and non-transgenic control male mice at 10 months old ( $n = 3$ ).

(D) Splicing analysis of *Cd33* using RNA-seq data of myeloid cells from PyMT breast cancer model mice ( $n = 3$ , female at unspecified age, GSE212643), dendritic cells ( $n = 4$ , from 6–8 weeks old female mice, GSE205069), and Mast Cells ( $n = 3$ , from bone marrow of BALB/c mice, GSE206630). In B-D, error bars represent SD.

**Figure S6**

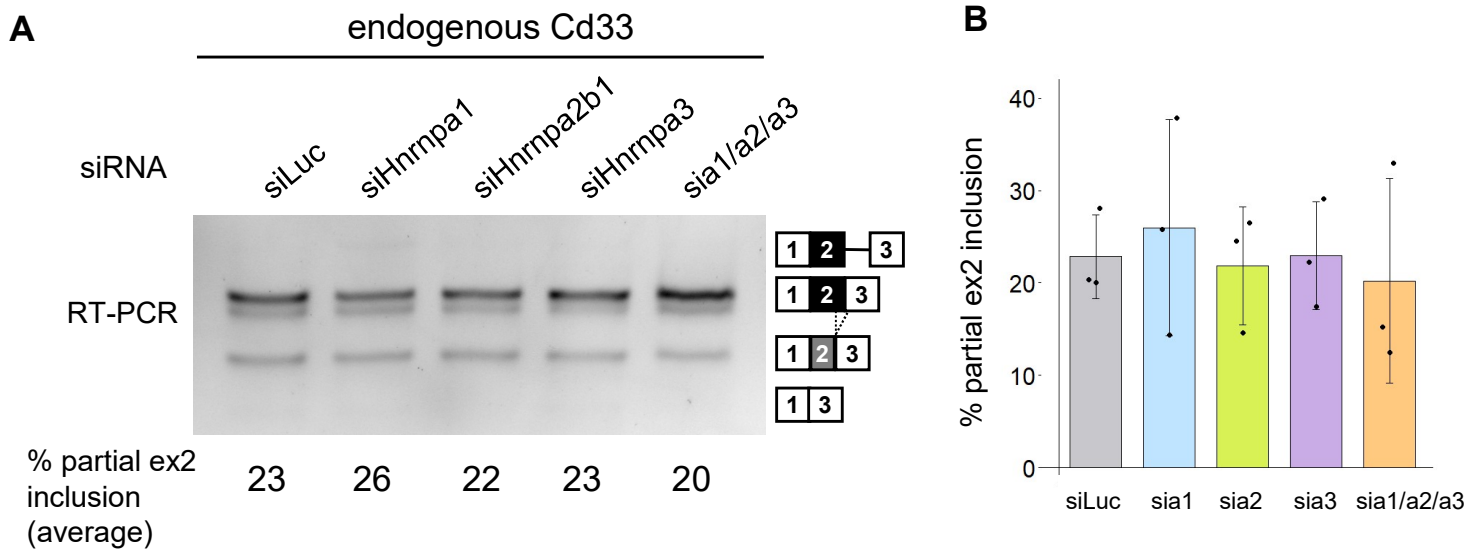

**Figure S6. Effect of siRNA targeting HNRNPA proteins on Cd33 splicing in RAW264.7 cells.**

(A) RAW264.7 cells were treated with siRNA and analyzed using Cd33 splicing assay. There was negligible detection of exon 2 skipping.

(B) Quantification of splicing assay results. Bar chart shows the proportion of partial exon 2 inclusion (n = 3). Error bars represent SD. No significant difference was observed (Tukey's test).

**Figure S7**

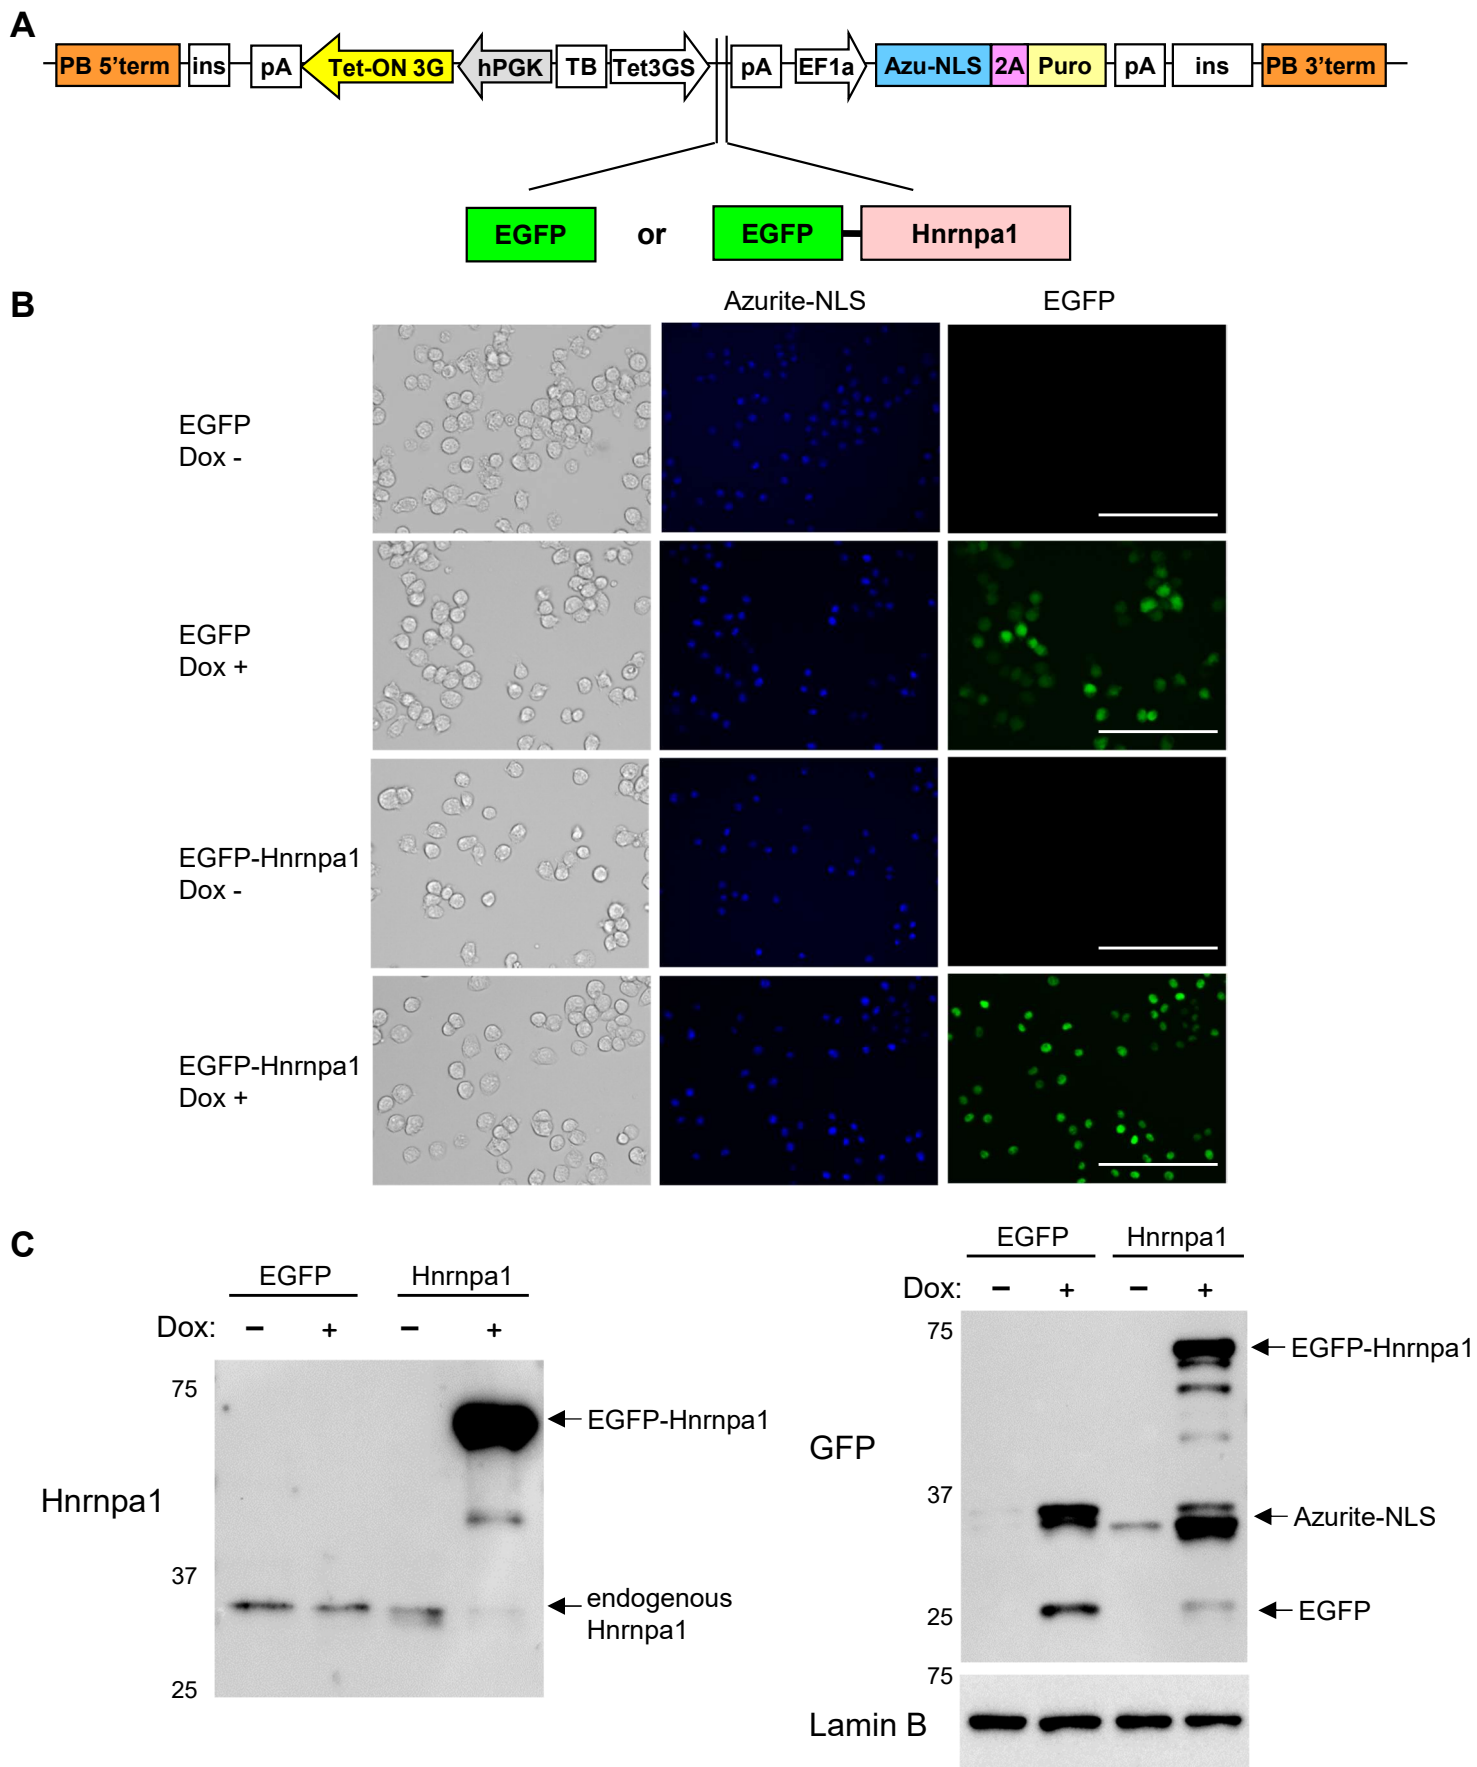

**Figure S7. RAW264.7-based cells inducibly expressing EGFP or EGFP-Hnrnpa1.**

(A) PB-Tet-Azu-Puro vector used for inducible expression of EGFP and EGFP-Hnrnpa1. Azu: Azurite blue fluorescence protein fused with three copies of nuclear localization signal. Structure details are as in Fig. S3A.

(B) Expression of Azu and EGFP-Hnrnpa1 in the RAW264.7 cells harboring the above constructs. Cell images in the presence and absence of doxycycline are shown. Azu was visualized using DAPI filter panels. Scale bar: 150  $\mu$ m.

(C) Expression of EGFP and EGFP-Hnrnpa1 detected with western blotting using indicated antibodies.



**Figure S8**

**A**

**human CD33**

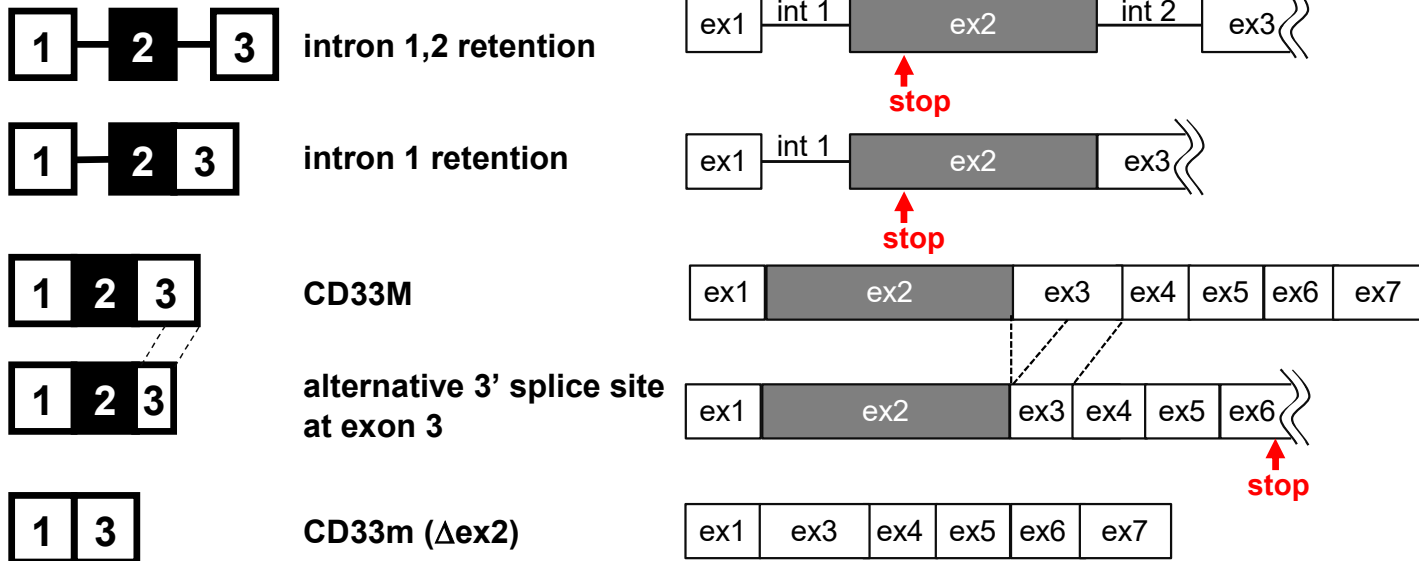

**B mouse CD33**

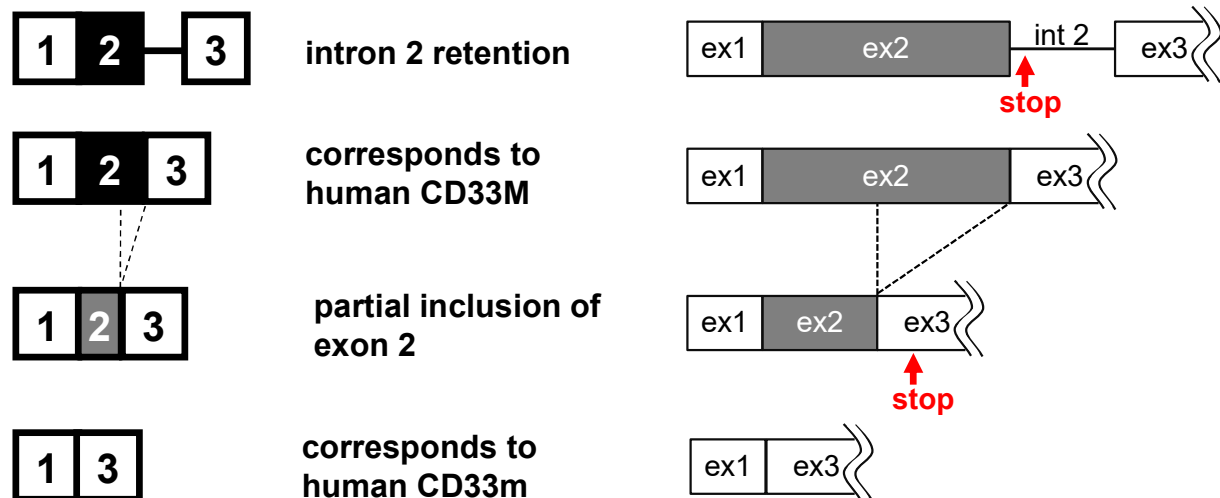

**Figure S8. Prediction of CD33 proteins derived from the detected splicing products.**

Termination codons that lead to truncation of the C-terminus are shown in red.

# Figure S9

Fig. 1B

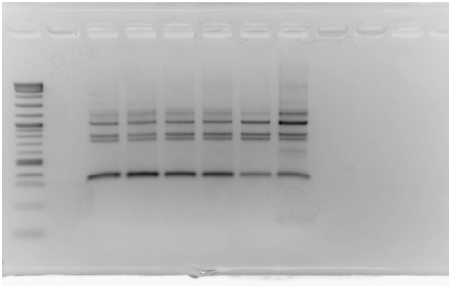

Fig. 1D

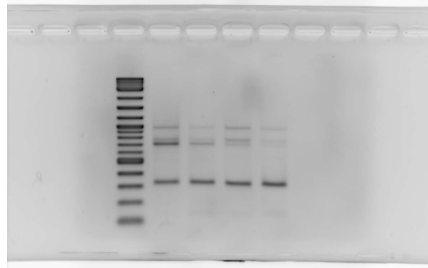

Fig. 1C

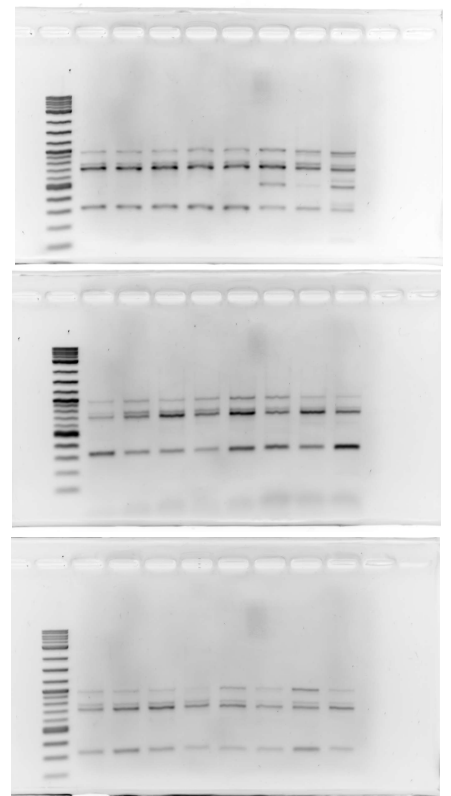

Fig. 2A

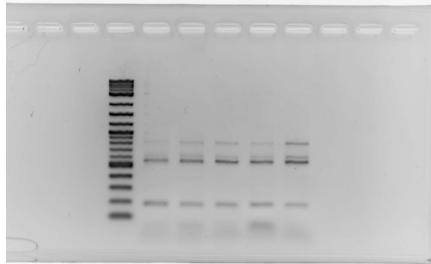

Fig. 2B

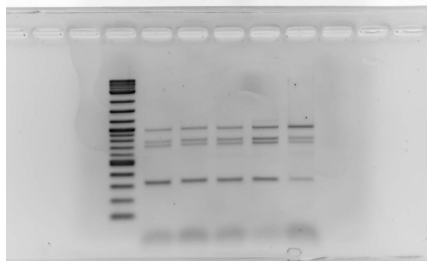

Fig. 2C

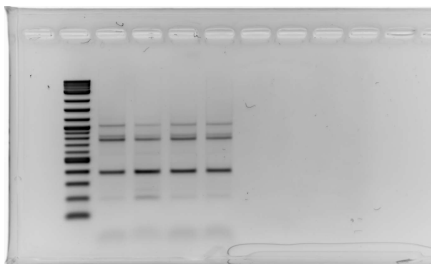

Fig. 3A

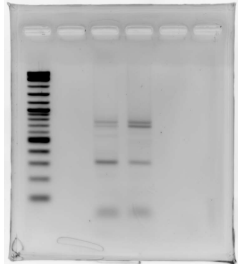

Fig. 5A

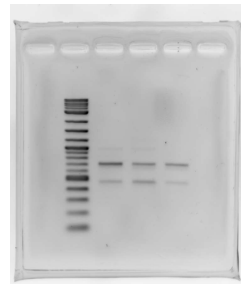

8 w

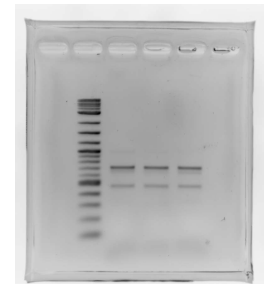

24 w

Fig. 3B

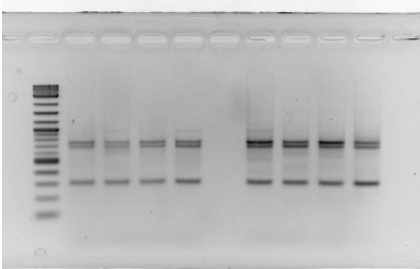

Fig. 3C

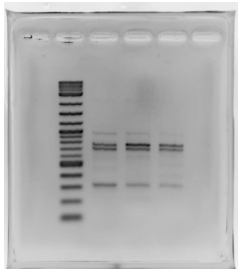

Fig. 4A

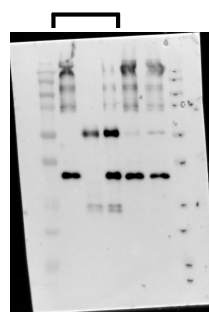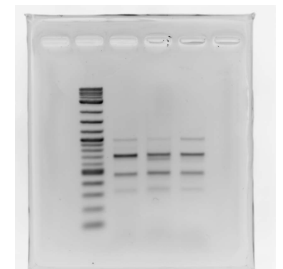

48 w

Fig. 6B

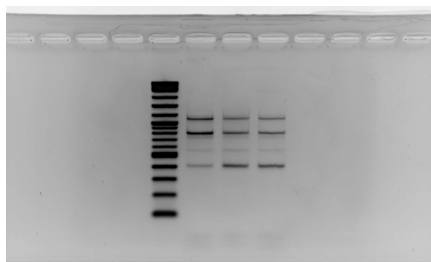

Fig. 6C

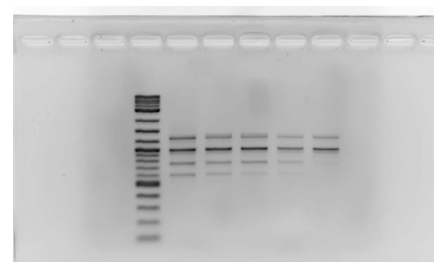

Fig. 6D

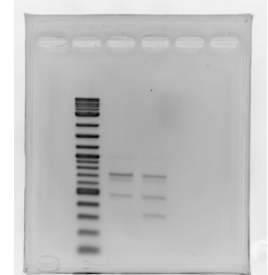

**Figure S9 (continued)**

**Fig. S2A**

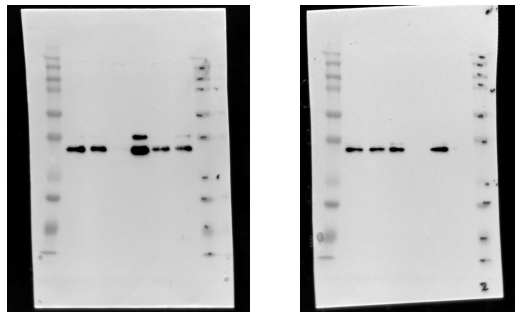

HNRNPA1

HNRNPA2B1

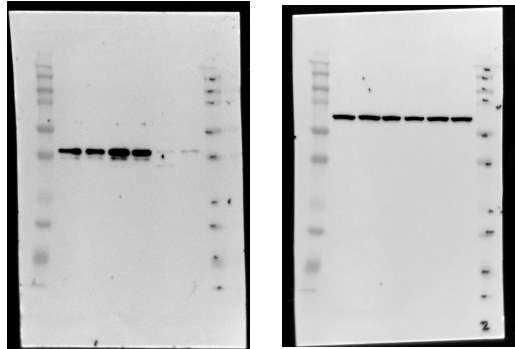

HNRNPA3

HSP60

**Fig. S2B**

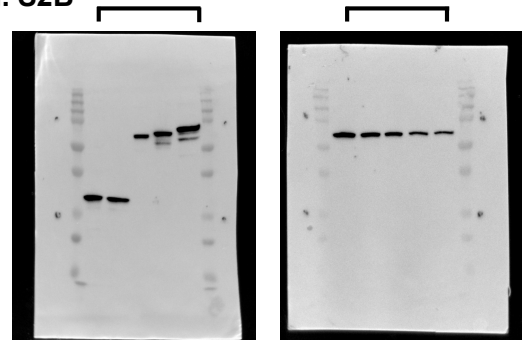

GFP

HSP60

**Fig. S2C**

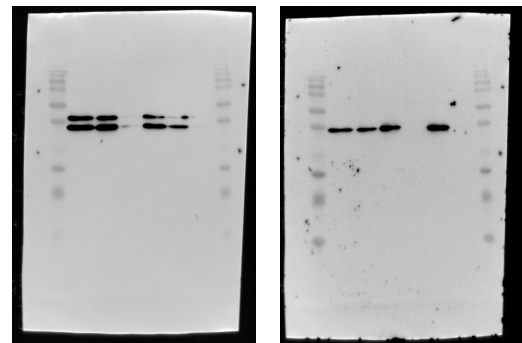

Hnrnpa1

Hnrnpa2b1

**Fig. S3C**

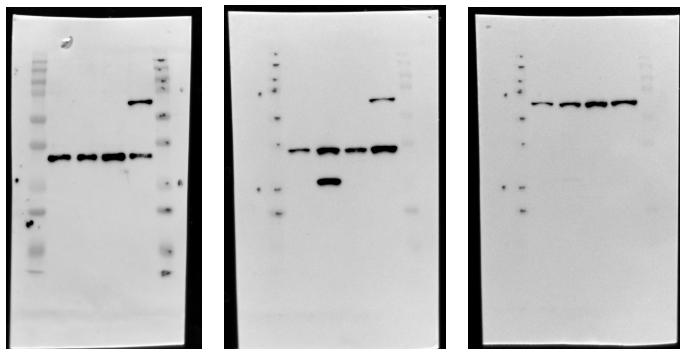

HNRNPA1

GFP

HSP60

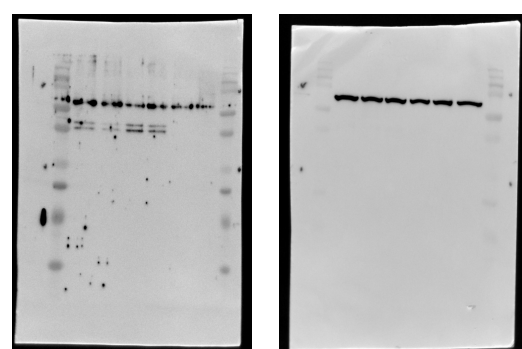

Hnrnpa3

Hsp60

**Fig. S4**

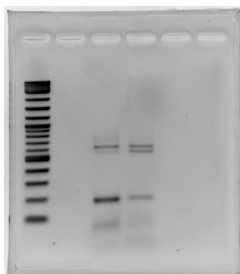

**Fig. S5**

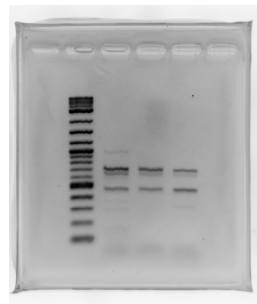

8 w

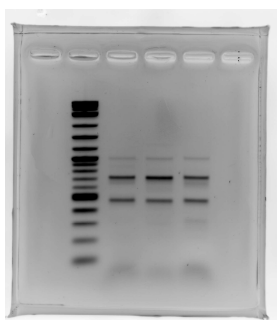

24 w

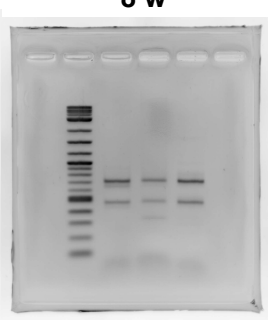

48 w

**Fig. S6**

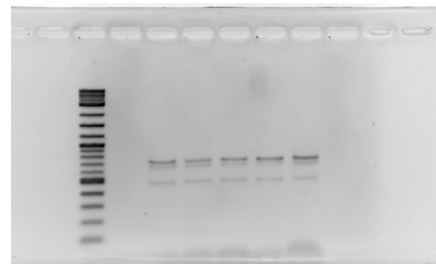

**Fig. S7C**

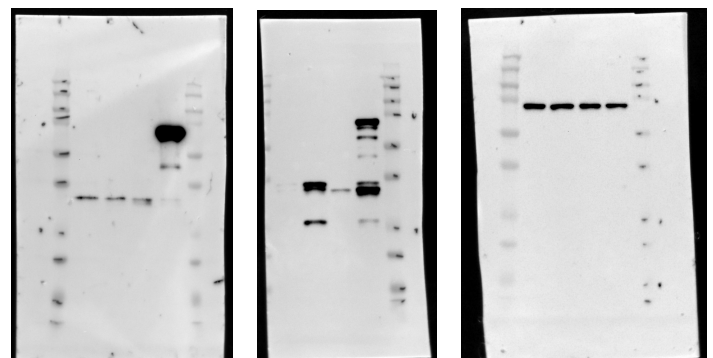

Hnrnpa1

GFP

Lamin B

**Figure S9. Uncropped images.**

**Table S1. List of oligonucleotides used in this study**

**Primers for construction**

| Construct           | Primer                                                                                                     | Sequence (5' to 3')                                                                                                                                                                                                               |
|---------------------|------------------------------------------------------------------------------------------------------------|-----------------------------------------------------------------------------------------------------------------------------------------------------------------------------------------------------------------------------------|
| CD33 minigene       | BglII-CD33-ex1-Fw<br>XhoI-CD33-ex3-Rv<br>nest-CD33-Fw<br>nest-CD33-int3-Rv<br>CD33-A14V-Fw<br>CD33-A14V-Rv | AAAAAGATCTATGCCGCTGCTGCTACTGCTGCCCC<br>AAAACTCGAGAGGTGACGTTGAGCTGGATGGTTCT<br>CTGAGGTCTCCTGCTCCTCCCGAGCTTCTGTCCG<br>GTCAAGCTCCCCGCTAAGCACGACAGGCTTTACC<br>TCCCCACAGGGGTCTGGCTATGGATCCAAATTC<br>TCCATAGCCAGGACCCCTGTGGGGAACGAGGGTC |
| mouse Cd33 minigene | nest-moCd33-Fw<br>nest-moCd33-Rv<br>BglII-moCd33-ex1-Fw<br>XhoI-moCd33-ex3-Rv                              | ACCCATGACAGGAAGCGTCAACCACCAAC<br>AACTAGTCAAGACATCATAGTCAGAAAGAC<br>AAAAAGATCTATGCTGTGGCCACTGCCGCTGTTT<br>AAAACTCGAGGGGTAACTTGGCTGGATGGTC                                                                                          |
| human hnRNPA1       | nest-huHNRNPA1-Fw<br>nest-huHNRNPA1-Rv<br>BglII-huHNRNPA1-Fw<br>Sall-huHNRNPA1-Rv                          | CGCCGAAGAAGCATCGTTAAAGTCTCTCTTACCCC<br>TGTCACCTTCTCTGGCTCTCCTCTCCTGCTAAGCTT<br>AAAAAGATCTATGTCTAAGTCAGAGTCTCCTAAAG<br>AAAAGTCGACTTAAATCTTGTGCCACTGCCATA                                                                           |
| OriCiro             | SV40pA-oric-Fw<br>CMV-oric-Rv<br>CMV-upstream-Fw<br>SV40-downstream-Rv                                     | TGGTTTGTCCAACTCATCAATGTATCTTAACGCGTAAATCTGCTCTGATGCCGCATAG<br>ATGAATAATGACCCCGTAATTGATTACTATTATAACTAGTGTGCGGGCTGGCTTAAC<br>TAGTTATTAATAGTAATCAATTACGGGGTCATTAG<br>ATTTACGCGTTAAGATACATTGATGAGTTTGGACA                             |
| mouse Hnrnpa1       | BamHI-hnRNPA1-Fw<br>XhoI-hnRNPA1-stop-Rv                                                                   | AAAGGATCCATGTCTAAGTCCGAGTCTCC<br>AACTCGAGTTAGAACCTCCTGCCACTG                                                                                                                                                                      |
| Azurite             | Azu-g197-Fw<br>Azu-g197-Rv<br>Azu-a451-Fw<br>Azu-a451-Rv<br>BspEI-Azu-Rv                                   | TCGTGACCACCCTGAGCCACGGCGTGCAGTG<br>CACTGCACGCCGTGGCTCAGGGTGGTCACGA<br>TTCAACAGCCACAACATCTATATCATGGCCG<br>CGGCCATGATATAGATGTTGTGGCTGTTGAA<br>AAAATCCGACTTGTACAGCTCGTCATGCCGTGAGTGATCCCGCGCGGGTCTGAAGTCCAG                          |
| PB-Tet vector       | NheI-Tet-Fw<br>Sall-Tet-Rv<br>BamHI-EGFP-Rv<br>CMV-Fw2-new<br>SV40pA-seq-Rv                                | AAAAAGCTAGCCCATCACTAGGGGTTCTAGATCT<br>AAAAAGTCGACCACTAGGGGTTCTCATCGATATC<br>AAAAAGGATCCTCAGAGTCCGACTTGTACAGCTC<br>TCCAAGTCTCACCCCA<br>AATGCTTTATTTGTGTTGTGATGCTATTGC                                                              |

**Primers for splicing assay**

| Target                | Primer                                                          | Sequence (5' to 3')                                                                                               |
|-----------------------|-----------------------------------------------------------------|-------------------------------------------------------------------------------------------------------------------|
| human CD33 minigene   | EGFP-C1-Fw<br>CD33-ex3-Rv<br>CD33-ex3-52-Rv<br>CD33-ex1-Fw      | CATGGTCCTGCTGGAGTTCGTG<br>GACGTTGAGCTGGATTCTCCGTAGTCACAC<br>GCAGGTCAGGTTTTTGGAGT<br>GAAGCTGCTTCTCAGCCGCTGCTGCTACT |
| endogenous human CD33 | CD33-new-Fw2<br>CD33-new-Rv2<br>CD33-new-Fw5<br>CD33-new-Rv5    | TCAGACATGCCGCTGCT<br>CTGGATGGTTCTCTCCGTAGTC<br>CTGCTTCTCAGACATGCCG<br>CAGGAGAAGATCGGGGGTGT                        |
| mouse Cd33 minigene   | EGFP-C1-Fw<br>XhoI-moCd33-ex3-Rv<br>SV40pA-seq-Rv               | CATGGTCCTGCTGGAGTTCGTG<br>AAAACTCGAGGGGTAACTTGGCTGGATGGTC<br>AATGCTTTATTTGTGTTGTGATGCTATTGC                       |
| mouse endogenous Cd33 | Cd33-ex1-splicing-Fw<br>moCd33-ex4-sp-Rv2<br>XhoI-moCd33-ex3-Rv | CCACTGCCGCTGTTCTT<br>CTCTCTCATCTGGCCTGATTTT<br>AAAACTCGAGGGGTAACTTGGCTGGATGGTC                                    |

**Primer pairs used for splicing assay**

| Figure            | Primer                                     | Target                                                   |
|-------------------|--------------------------------------------|----------------------------------------------------------|
| Fig. 1B,C,D, 2B,C | CD33-ex1-Fw<br>CD33-ex3-Rv                 | HEK293T human CD33 CV&A14V minigenes (over expression)   |
| Fig. 2A           | EGFP-C1-Fw<br>CD33-ex3-52-Rv               | HEK293T human CD33 CV minigene (RNAi)                    |
| Fig. 3A,B         | CD33-new-Fw2<br>CD33-new-Rv2               | THP-1 endogenous CD33                                    |
| Fig. 3C           | CD33-new-Fw2<br>CD33-new-Rv2               | Cellartis Microglia endogenous CD33                      |
| Fig. 5A           | Cd33-ex1-splicing-Fw<br>XhoI-moCd33-ex3-Rv | mouse hippocampus endogenous Cd33                        |
| Fig. 6B           | EGFP-C1-Fw<br>XhoI-moCd33-ex3-Rv           | Cd33 minigene (HNRNPA1/Hnrnpa1 overexpression in HEK293) |
| Fig. 6C           | EGFP-C1-Fw<br>SV40pA-seq-Rv                | Cd33 minigene (RNAi in Neuro2a)                          |
| Fig. 6D, S5       | Cd33-ex1-splicing-Fw<br>moCd33-ex4-sp-Rv2  | RAW264.7 endogenous Cd33 (A1 over expression)            |
| Fig. S4           | CD33-new-Fw5<br>CD33-new-Rv5               | iCell Microglia endogenous CD33                          |

**siRNA**

| Target          | Sense strand [19 mer(RNA) + TT] |
|-----------------|---------------------------------|
| siHNRNPA1-440   | gcuuugccuuuuaaccuuTT            |
| siHNRNPA2B1-841 | uuccacuucaauuuuccTT             |
| siHNRNPA3-1105  | ggaagugguugauuagguaTT           |
| siHnrnpa1-167   | gcuuuggguuugucacauaTT           |
| siHnrnpa2b1-30  | gcucuuuauuggugcuuaTT            |
| siHnrnpa3-564   | ccacacuuauuagggcacauTT          |

**qPCR primers for RIP**

| Target        | Primer                             | Sequence (5' to 3')                            |
|---------------|------------------------------------|------------------------------------------------|
| CD33 intron 2 | RT-CD33-610-Fw6<br>RT-CD33-679-Rv6 | CAGAGTTTATCTTCTCTCAGG<br>CCTGTGGGTCAAGTCTAGTG  |
| CD33 exon 7   | RT-CD33-ex7-Fw<br>RT-CD33-ex7-Rv   | TACTGTGGAGATGGATGAGGAG<br>GGGTCCTGACCTCTGATTAT |

Table S2. List of antibodies used in this study

| primary antibodies               | Source      | Identifier    | Dilution  |
|----------------------------------|-------------|---------------|-----------|
| mouse monoclonal Anti-hnRNP A1   | abcam       | 9H10          | 1:200     |
| mouse monoclonal Anti-hnRNP A1   | Biolegend   | 4B10          | 1:30 (IP) |
| mouse monoclonal anti-hnRNP A2B1 | abcam       | DP3B3,ab6102  | 1:1000    |
| rabbit polyclonal anti-HNRNPA3   | proteintech | 25142-1-AP    | 1:1000    |
| goat polyclonal anti-Lamin B     | santa cruz  | sc-6217,M-20  | 1:3000    |
| goat polyclonal anti-HSP60       | santa cruz  | sc-1052, N-20 | 1:1000    |
| mouse monoclonal anti-GFP        | santa cruz  | sc-9996, B-2  | 1:3000    |

| secondary antibodies           | Source | Identifier | Dilution |
|--------------------------------|--------|------------|----------|
| Donkey Anti-Goat IgG H&L (HRP) | abcam  | ab97120    | 1:5000   |
| Goat Anti-Mouse IgG H&L (HRP)  | abcam  | ab97040    | 1:5000   |
| Goat Anti-Rabbit IgG H&L (HRP) | abcam  | ab6721     | 1:5000   |

Table S3. List of RNA-seq data used for splicing analysis

| Figure   | GEO ID    | BioProject ID | Sample source               | Preparation                                                  | Experiments                                        |
|----------|-----------|---------------|-----------------------------|--------------------------------------------------------------|----------------------------------------------------|
| Fig. S5B | GSE164675 | PRJNA691543   | 3 mo microglia              | Isolated from brain tissues using Cd11b+ magnetic microbeads | SRX9833337, SRX9833338, SRX9833339, SRX9833340     |
|          |           |               | 17 mo microglia             |                                                              | SRX9833349, SRX9833350, SRX9833351, SRX9833352     |
| Fig. S5C | GSE171195 | PRJNA718619   | Ntg (WT)                    | Isolated from hippocampi using FACS (CD45lo/CD11b+ cells)    | SRX10484534, SRX10484535, SRX10484539              |
|          |           |               | Tg (APP/PS1)                |                                                              | SRX10484529, SRX10484540, SRX10484541              |
| Fig. S5D | GSE212643 | PRJNA876305   | Monocyte                    | Isolated from PyTM mouse tissues using FACS                  | SRX17415932, SRX17415931, SRX17415930              |
|          |           |               | Tumor-associated macrophage |                                                              | SRX17415926, SRX17415925, SRX17415924              |
|          |           |               | Mammary tissue macrophage   |                                                              | SRX17415929, SRX17415928, SRX17415927              |
| Fig. S5D | GSE205069 | PRJNA843611   | Dendritic cell              | Cell Trace Violet-stained BMDC isolated using FACS           | SRX15498788, SRX15498787, SRX15498786, SRX15498785 |
| Fig. S5D | GSE206630 | PRJNA851610   | Mast cell                   | Primary cultured cells from mouse femurs                     | SRX15823347, SRX15823346, SRX15823345              |
